# Supplementary material for: Constructing a Predictive Model for PD-1 Blockade Therapy in Pan-Cancer Based on Machine Learning
Source: Research Square preprint supplement (doi:10.21203/rs.3.rs-6317412/v1), 2025-04-03
Supplement: Supplementary file 1 [file 257d26419a8aa1aae144e300.pdf]

## Supplementary Figures Here

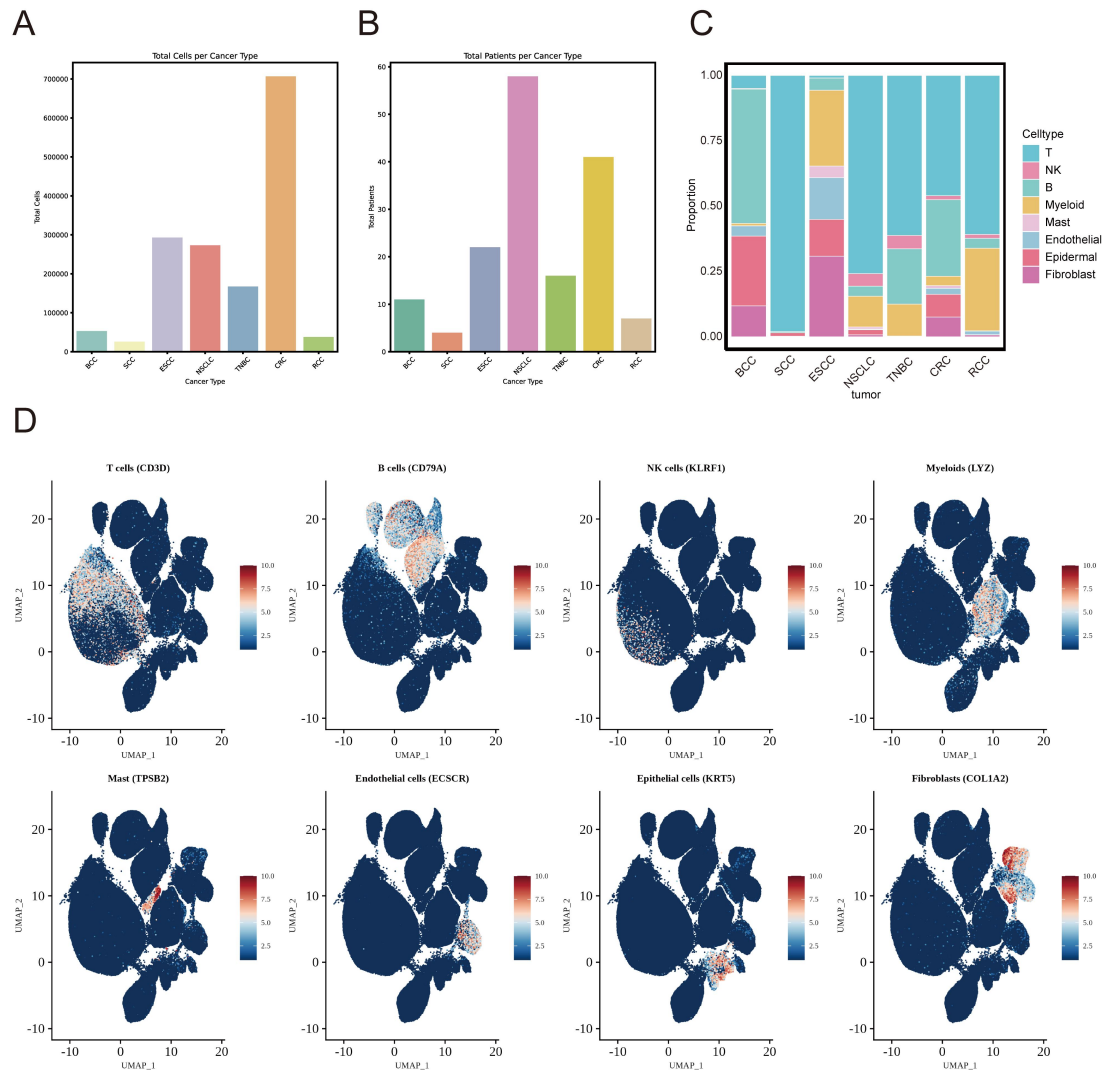

**Figure S1 Information on patient cohorts and cell populations.**

(A-B) Bar plots summarizing the total number of cells collected by cancer type (A) and the number of patients included (B). (C) Frequency of major cell types across all cancer types. (D) UMAP plot showing the expression of typical marker genes for major cell populations.

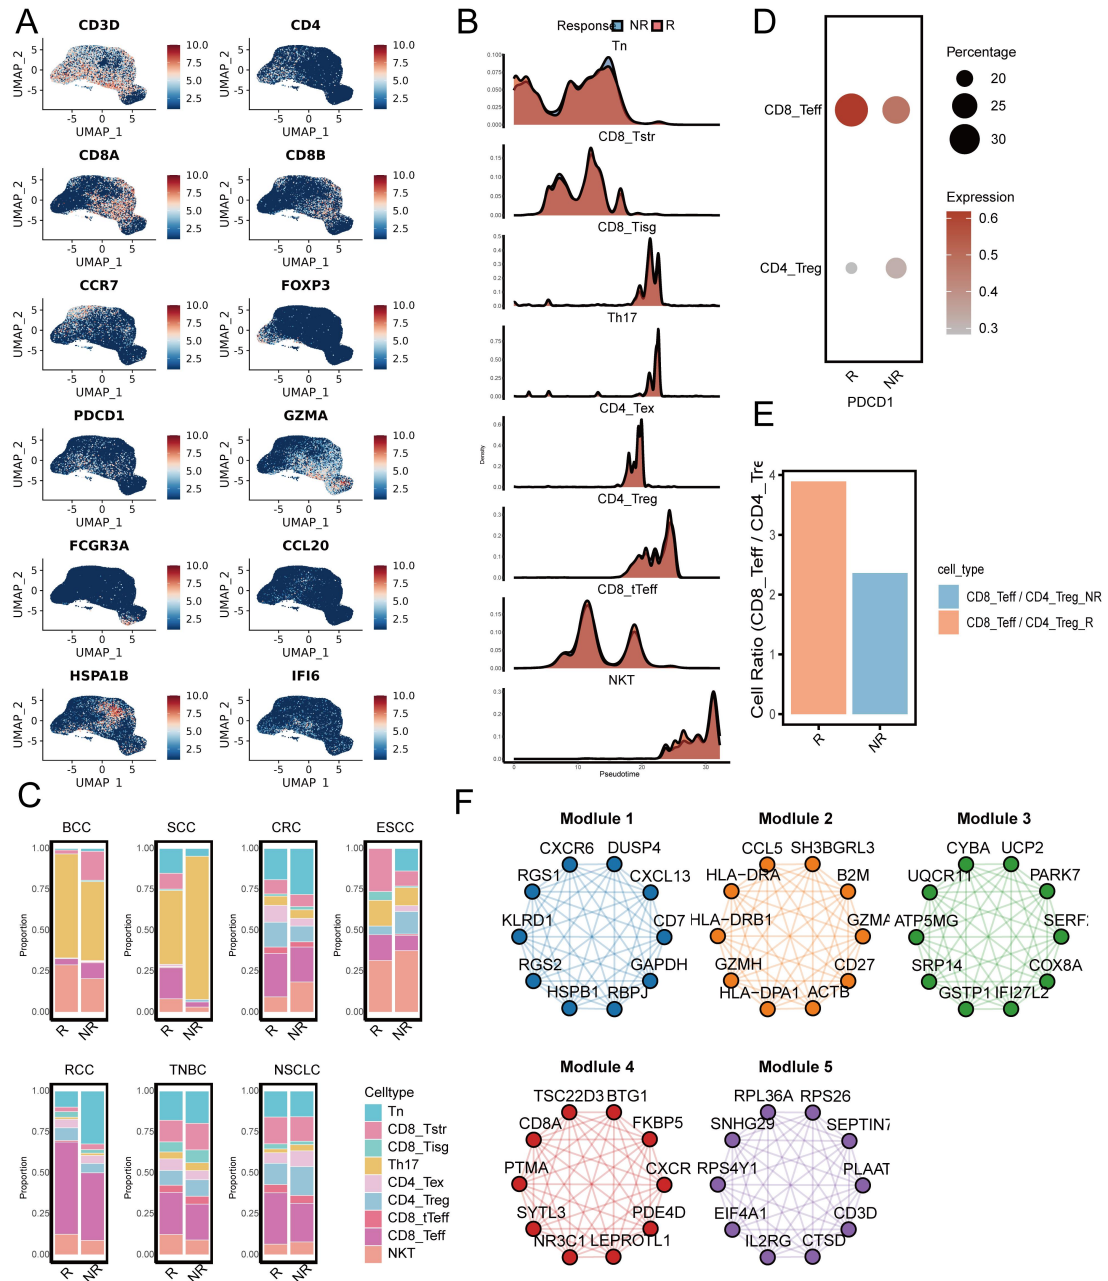

**Figure S2 Characteristics of T-cell subpopulations.**

(A) UMAP plot showing the expression of typical marker genes in major T-cell subpopulations. (B) Distribution of T cells along pseudotime in R and NR groups. (C) Proportions of T-cell subpopulations in R and NR across different cancer types. (D) Expression of PDCD1 in CD8\_Teff and CD4\_Treg cells between R and NR groups. (E) Ratio of PDCD1-expressing CD8\_Teff to CD4\_Treg cells in R and NR. (F) Top ten genes for each gene module.

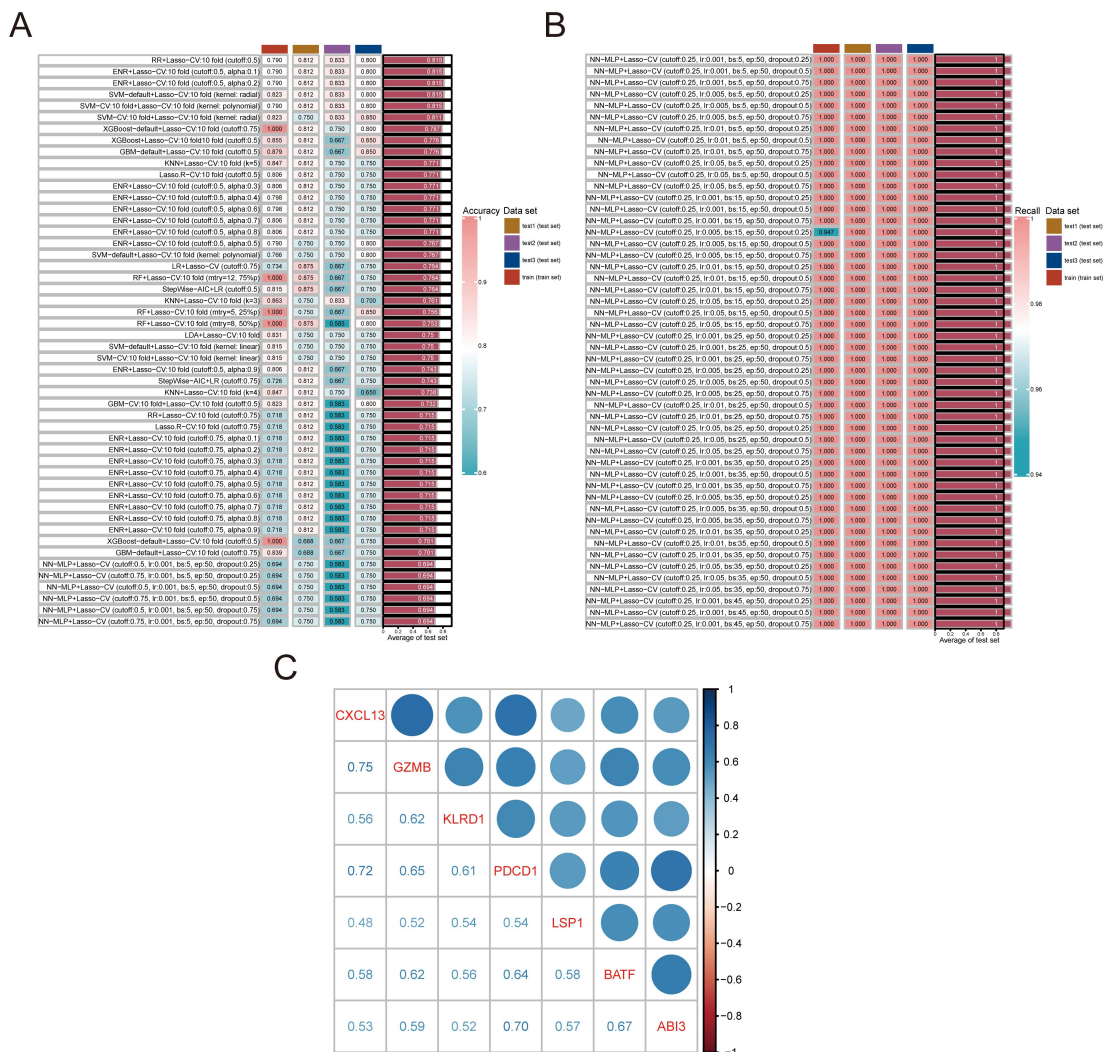

**Figure S3 Construction of the ETIRGS model.**

(A-B) Performance of the top 50 machine learning models based on accuracy (A) and recall (B).

(C) Heatmap showing the correlation among the seven genes included in the ETIRGS model.

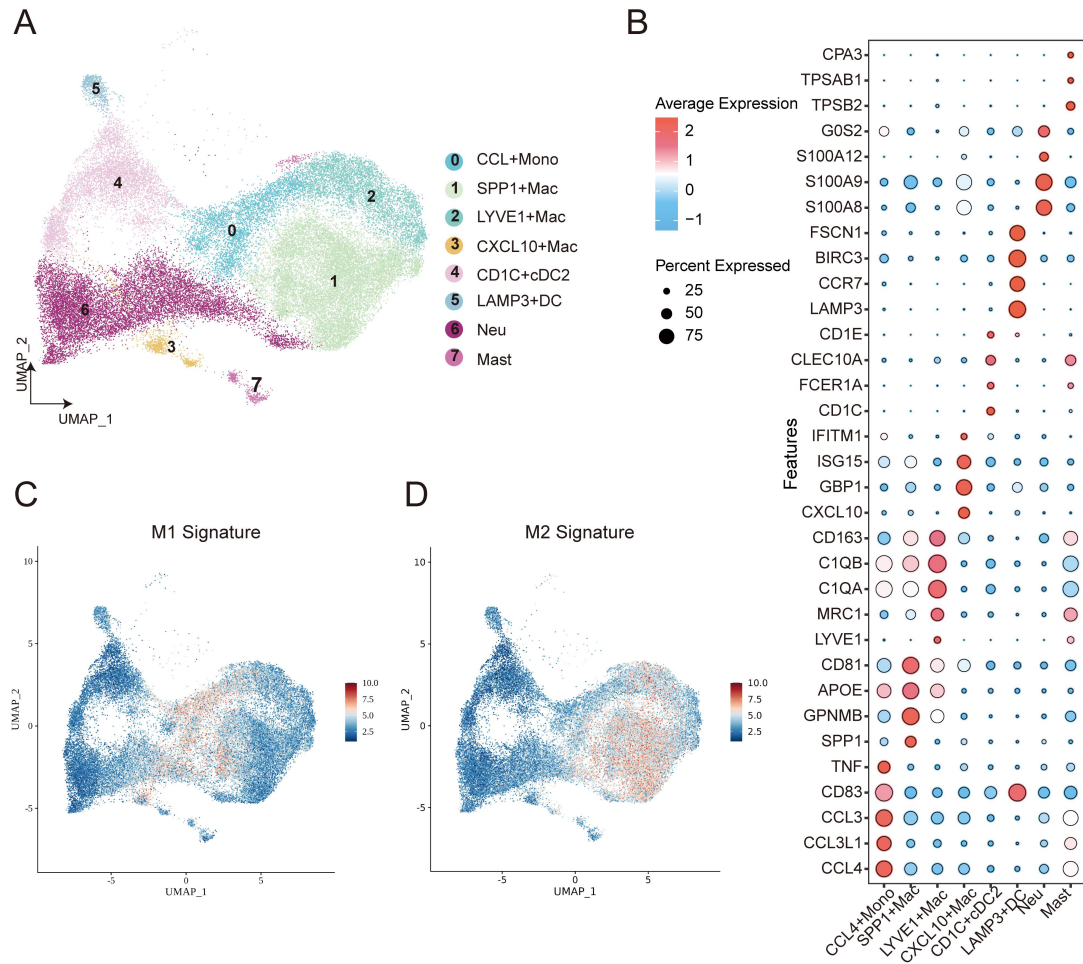

**Figure S4 Characteristics of myeloid cells.**

(A) UMAP plot displaying the clustering of eight myeloid cell subpopulations. (B) Expression of marker genes in the defined myeloid cell subpopulations. (C-D) UMAP visualization of M1 (C) and M2 (D) macrophage.
