# Supplementary material for: Constructing a Predictive Model for PD-1 Blockade Therapy in Pan-Cancer Based on Machine Learning
Source: Research Square preprint supplement (doi:10.21203/rs.3.rs-6317412/v1), 2025-04-03
Supplement: Supplementary file 1 [file 577b1f260a36b50e3597ef21.xlsx]

## Sheet: Table S1
Supplementary Table S1 Here
Legend: Table S1 details the seven different cancer types included in this study, as well as clinical information on the treatment response status of each cancer type.
To address the inconsistency in response assessment terminology across different studies, patients categorized as CR, PR, MPR, or pCR were defined as responders (R), while patients categorized as SD, PD, non-MPR, non-pCR, or IPR were defined as non-responders (NR).
Cancer	Dataset ID	PMID
Basal cell carinoma tumor（BCC）\Squamous cell carcinoma tumor（SCC）	GSE123813	31359002
Tumor Type	Treatment	Ongoing Vismodegib treatment	Prior treatment	Response	Best % change	scRNA pre site	scRNA days pre treatment	scRNA post site	scRNA days post treatment	Adaptive pre site	Adaptive days pre treatment	Adaptive post site	Adaptive days post treatment	PBMC Adaptive days pre treatment	PBMC Adaptive days post treatment	Exome pre site	Exome days pre treatment	Exome post site	Exome days post treatment
BCC	Pembrolizumab	+	Vismodegib	Yes	-81	L arm	-239, -78	L arm	83	L arm	-78, -5	L arm	83, 146	-239	104	L arm	-78	L arm	146
BCC	Pembrolizumab	-	Vismodegib	Yes	0*	Nose	0	Nose	62	Nose	-602	NA	NA	NA	117	Nose	0	Nose	62
BCC	Pembrolizumab	-	Vismodegib	Yes	-100	R arm	-243	R chest	16, 121	NA	NA	R chest	15	-243	16	R arm	-244	R arm	155
BCC	Cemiplimab	-	-	Yes	-25	Knee	1	Knee	38	NA	NA	NA	NA	NA	NA	Knee	0	NA	NA
BCC	Pembrolizumab	-	Vismodegib	No	5	L ear	0	L ear	105	L ear	-28	L ear	42	0	42	L ear	0	L ear	105
BCC	Pembrolizumab	+	Vismodegib	No	-11	R neck	0	R neck	21	R neck	-280	R neck	140	-84	140	R neck	-79	R neck	21
BCC	Pembrolizumab	-	Vismodegib	No	10	L cheek	-3	L cheek	60	L cheek	-3	L cheek	60	-1855	39	L cheek	-3	L cheek	60
BCC	Pembrolizumab	+	Vismodegib	No	0	R arm	-91	R arm	43	R arm	-43	R arm	42	-98	43	NA	NA	R arm	43
BCC	Cemiplimab	-	Sonidegib	Yes	-62	L forehead	0	L forehead	21	L forehead	0	L forehead	21	NA	NA	NA	NA	NA	NA
SCC	Pembrolizumab	-	-	Yes	-100	L ear	-6	L ear	21	L ear	-12	L ear	21	NA	NA	NA	NA	NA	NA
BCC	Pembrolizumab	-	-	No	10	R calf	-6	R calf	21	R calf	-12	R calf	21	NA	NA	NA	NA	NA	NA
SCC	Cemiplimab	-	Radiation	Yes (CR)	-100	L scalp	-13	L scalp	29	NA	NA	NA	NA	NA	NA	NA	NA	NA	NA
BCC	Cemiplimab	-	Vismodegib	Yes	-57	L cheek	0	L cheek	21	L cheek	0	L cheek	21	NA	NA	NA	NA	NA	NA
SCC	Pembrolizumab	-	Radiation, Cetuximab	No	3	scalp	-7	scalp	49	scalp	-7	scalp	45	NA	NA	NA	NA	NA	NA
SCC	Cemiplimab	-	Radiation, Capecitabine	No	117	R neck	0	R neck	28	R neck	0	R neck	28	NA	NA	NA	NA	NA	NA
Cancer	Dataset ID	PMID
non-small-cell lung cancer（NSCLC）	GSE229353	37231145
Patient	Age	Sex	Therapt	Pathology	RVT	Pathologic response
P01	68	Male	NAC	SCC	0.4	non-MPR
P02	69	Male	NAPC	SCC	0.9	non-MPR
P03	51	Female	NAPC	SCC	0	MPR
P04	66	Female	NAPC	AD	0.8	non-MPR
P05	67	Male	NAPC	SCC	0	MPR
P06	62	Male	NAPC	SCC	0	MPR
P07	46	Male	NAPC	AD	0.6	non-MPR
MPR: Major Pathologic Response
non-MPR: Non-Major Pathologic Response
Cancer	Dataset ID	PMID
non-small-cell lung cancer (NSCLC)	GSE207422	36869384
Sample	Patient	Resource	Sex	Age	Clinical Stage	Pathology	PD1 Antibody	Chemotherapy	Pathologic Response	Residual Tumor	RECIST
BD_immune01	P01	Pre-treatment biopsy	Male	68	IIIA	Squamous	Toripalimab	Carboplatin+Docetaxel	NE	NE	SD
BD_immune02	P02	Post-treatment surgery	Female	67	IIIA	Adeno	Toripalimab	Carboplatin+Pemetrexed	NMPR	0.8	PR
BD_immune03	P03	Post-treatment surgery	Male	66	IIIA	Squamous	Toripalimab	Carboplatin+Gemcitabine	MPR	0.05	PR
BD_immune04	P04	Post-treatment surgery	Male	66	IIIA	Adeno	Toripalimab	Carboplatin+Pemetrexed	NMPR	0.2	PR
BD_immune05	P05	Pre-treatment biopsy	Female	34	IIIA	Adeno	Toripalimab	Carboplatin+Pemetrexed	NMPR	0.78	PR
BD_immune06	P06	Post-treatment surgery	Female	45	IIIA	Adeno	Toripalimab	Carboplatin+Pemetrexed	pCR	0	PR
BD_immune07	P07	Post-treatment surgery	Male	57	IIIA	Squamous	Toripalimab	Carboplatin+Gemcitabine	NMPR	0.9	SD
BD_immune08	P08	Pre-treatment biopsy	Female	61	IIIA	Adeno	Camrelizumab	Carboplatin+Pemetrexed	NMPR	0.95	SD
BD_immune09	P09	Post-treatment surgery	Male	66	IIIA	Squamous	Sintilimab	Carboplatin+Gemcitabine	NMPR	0.95	PR
BD_immune10	P10	Post-treatment surgery	Male	70	IIIA	Squamous	Sintilimab	Carboplatin+Gemcitabine	NMPR	0.7	PR
BD_immune11	P11	Post-treatment surgery	Female	67	IIIA	Adeno	Sintilimab	Carboplatin+Pemetrexed	MPR	0.09	SD
BD_immune12	P12	Post-treatment surgery	Male	77	IIIA	Adeno	Sintilimab	Carboplatin+Pemetrexed	NMPR	0.8	SD
BD_immune13	P13	Post-treatment surgery	Male	59	IIIA	Squamous	Sintilimab	Carboplatin+Gemcitabine	NMPR	0.4	PR
BD_immune14	P14	Post-treatment surgery	Male	79	IIIA	Squamous	Sintilimab	Carboplatin+Gemcitabine	MPR	0.01	PR
BD_immune15	P15	Post-treatment surgery	Male	55	IIIA	Adeno	Sintilimab	Carboplatin+Pemetrexed	NMPR	0.95	SD
# PR,partial response; SD,stable disease; PD, progressive disease
Cancer	Dataset ID	PMID
non-small-cell lung cancer (NSCLC)	GSE179994	35121991
Sample Name	Patient	Age	Gender	Tumor Type	Treatment	Response	Treatment Hx	Biospy Site
P001.pre.01	P001	57	Female	LUAD	Pembrolizumab + Carboplatin + Pemetrexed	Yes	Pre-treatment	LN metastasis
P001.post.01						Yes	On treatment	LN metastasis
P001.post.02						Yes	On treatment	LN metastasis
P001.post.03						No	On treatment	Right lung tumour
P002	P002	72	Male	LUSC	Treatment-naïve	-	-	Right lung tumour
P003	P003	59	Male	LUAD	Treatment-naïve	-	-	LN metastasis
P004	P004	57	Male	LUSC	Treatment-naïve	-	-	Right lung tumour
P005	P005	59	Male	LUSC	Treatment-naïve	-	-	LN metastasis
P006	P006	57	Male	LUAD	Treatment-naïve	-	-	Right lung tumour
P007	P007	79	Male	LUSC	Treatment-naïve	-	-	Left lung tumour
P008	P008	62	Female	LUAD	Treatment-naïve	-	-	Right lung tumour
P009	P009	52	Male	LUAD	Treatment-naïve	-	-	Right lung tumour
P010.pre.01	P010	53	Male	LUAD	Pembrolizumab + Carboplatin + Pemetrexed	Yes	Pre-treatment	LN metastasis
P010.post.01						Yes	On treatment	LN metastasis
P011	P011	58	Male	LUSC	Treatment-naïve	-	-	Kidney metastasis
P012	P012	65	Male	LUSC	Treatment-naïve	-	-	Right lung tumour
P013.pre.01	P013	61	Female	LUAD	Pembrolizumab + Carboplatin + Pemetrexed	Yes	Pre-treatment	Liver metastasis
P013.post.01						Yes	On treatment	Liver metastasis
P013.post.03						No	On treatment	LN metastasis
P014	P014	76	Male	LUSC	Treatment-naïve	-	-	Right lung tumour
P015	P015	67	Male	LUAD	Treatment-naïve	-	-	Left lung tumour
P016	P016	59	Female	LUAD	Treatment-naïve	-	-	LN metastasis
P017	P017	66	Male	LUSC	Treatment-naïve	-	-	Right lung tumour
P018	P018	75	Male	LUSC	Treatment-naïve	-	-	Right lung tumour
P019.pre.01	P019	73	Female	LUAD	Pembrolizumab + Carboplatin + Pemetrexed	Yes	Pre-treatment	LN metastasis
P019.post.01						Yes	On treatment	LN metastasis
P020	P020	70	Male	LUSC	Treatment-naïve	-	-	Right lung tumour
P021	P021	48	Male	LUAD	Treatment-naïve	-	-	Liver metastasis
P022	P022	70	Male	LUAD	Treatment-naïve	-	-	Right lung tumour
P023	P023	74	Male	LUAD	Treatment-naïve	-	-	Right lung tumour
P024	P024	59	Male	LUSC	Treatment-naïve	-	-	LN metastasis
P025	P025	47	Female	LUAD	Treatment-naïve	-	-	Liver metastasis
P026	P026	66	Male	LUSC	Treatment-naïve	-	-	Right lung tumour
P027	P027	78	Male	LUSC	Treatment-naïve	-	-	Right lung tumour
P028	P028	74	Male	LUSC	Treatment-naïve	-	-	Right lung tumour
P029.pre.01	P029	52	Male	LUAD	Pembrolizumab + Carboplatin + Pemetrexed	Yes	Pre-treatment	Left lung tumour
P029.post.01						Yes	On treatment	Left lung tumour
P030.pre.01	P030	65	Male	LUAD	Pembrolizumab + Carboplatin + Pemetrexed	Yes	Pre-treatment	Right lung tumour
P030.post.01						Yes	On treatment	Right lung tumour
P033.pre.01	P033	48	Male	LUAD	Pembrolizumab + Carboplatin + Pemetrexed	Yes	Pre-treatment	Right lung tumour
P033.post.01						Yes	On treatment	Right lung tumour
P034	P034	65	Male	LUSC	Treatment-naïve	-	-	Right lung tumour
P035.pre.01	P035	71	Male	LUAD	Pembrolizumab + Carboplatin + Pemetrexed	Yes	Pre-treatment	Right lung tumour
P035.post.01						Yes	On treatment	Right lung tumour
P036.post.01	P036	59	Male	LUSC	Pembrolizumab + Carboplatin + Albumin-bound paclitaxel	No	On treatment	Right lung tumour
P037.post.01	P037	64	Male	LUSC	Pembrolizumab + Carboplatin + Albumin-bound paclitaxel	No	On treatment	Left lung tumour
P038.post.01	P038	62	Male	LUSC	Pembrolizumab + Carboplatin + Albumin-bound paclitaxel	No	On treatment	Left lung tumour
Cancer	Dataset ID	PMID
triple negative breast cancer (TNBC)	GSE169246	34653365
Treatment	Patient ID	Clinical efficacy#	Biopsied lesion	Diameter of biopsied lesion (mm)	Size of target lesion / SOM (mm)	Age	Stage (TNM )	PD-L1	TILs (%)	Tumor			Blood			Relative change of target lesions (8 weeks after treatment initiation vs. Pre-treatment)*	Relative change of biopsied lesions (8 weeks after treatment initiation vs. Pre-treatment)*	Clinical efficacy#	Time to progression (months)$
										Pre-teatment	Post-treatment	Progression	Pre-teatment	Post-treatment	Progression
Anti-PD-L1+ Chemo	P019	PR	Lymph Node	15	36	45	rcTxN3M1	+	90	Y	Y		Y	Y		-0.67	-0.667	PR	23.6+
	P010	PR	Lung	21	35	33	rcT4NxM1	+	80	Y	N		Y	Y	Y	-0.63	-0.62	PR	7.5
	P012	PR	Lymph Node	28	28	47	rcTxN2M0	+	70	Y	Y		Y	Y		-0.46	-0.46	PR	7.7+
	P007	PR	Lymph Node	22	22	50	rcTxNxM1	-	N	Y	N	Y	Y	Y	Y	-0.45	-0.45	PR	3.4
	P017	SD	Lymph Node	16	45	57	cT2N2M1	-	1	Y	Y		Y	Y		-0.22	-0.22	SD	7.5
	P002	SD	Chest Wall	48	48	59	rcT4NxM0	+	50	Y	Y		Y	Y	Y	0	0	SD	7.2
	P004	SD	Chest Wall	35	35	45	rcT4NxM0	-	N	Y	N		Y	Y	Y	0.09	0.09	SD	3.4
	P005	SD	Liver	87	97	52	rcTxNxM1	-	10	Y	Y		Y	Y		0.09	0.01	SD	3.4
	P016	SD	Chest Wall	24	24	32	rcT4NxM1	-	1	Y	Y		Y	Y	Y	0.167	0.167	SD	3.1
Chemo	P022	PR	Breast	33	48	55	cT2N2M1		2	Y	Y		Y	Y		-0.848	-0.848	PR	2.9+
	P020	PR	Breast	37	55	34	cT2N2M0		20	Y	Y		Y	Y		-0.553	-0.553	PR	3.6+
	P013	PR	Liver	36	152	51	rcTxNxM1		<1	Y	Y	Y	Y	Y	Y	-0.3	-0.3	PR	4.2
	P025	SD	Breast	26	26	53	cT2N1M0		10	Y	Y		Y	Y		-0.231	-0.231	SD	2
	P018	SD	Breast	48	48	44	cT2N2M0		5	Y	Y		Y	Y		-0.091	-0.091	SD	2+
	P023	SD	Breast	26	42	38	cT2N2M0		20	Y	Y		Y	Y		0.026	0.026	SD	2.6+
	P003	PD	Chest Wall	11	30	38	rcT4NxM1		<1	N	Y		N	N		2.6	7.91	PD	1.8
N,Not available; Y,Yes
* Negative values ​​indicate tumor shrinkage; positive values ​​indicate tumor progression;0 indicates no change in tumor size.
# PR,partial response; SD,stable disease; PD, progressive disease
$The + sign represents censored data. These patients either have not progressed and are still being treated (P019), or the treatment and follow-up were discontinued before disease progression due to COVID-19 and other personal reasons (other marked patients).
Cancer	Dataset ID	PMID
Colorectal Cancer (CRC)	GSE205506	37172580
Treatment	Patient ID	Treatment response#	Tumor anatomical location	Mismatch repair defective protein	Microsatellite status	Stage(cTMN)	Sex	Age	Tumor		Normal	Treatment response#
									pre-treatment	Post-treatment	Post-treatment
Anti-PD-1	P12	non-pCR	Hepatic flexure of colon	MLH1, PMS2	MSI-H	cT4aN0M0-IIB	M	67	N	Y	Y	non-pCR
	P15	pCR	Ascending colon	MSH6	NA	cT4aN1M0-IIIB	F	58	N	Y	Y	pCR
	P17	pCR	Descending colon	PMS2	MSI-H	cT4aN1M0-IIIB	M	62	N	Y	Y	pCR
	P18	non-pCR	Transverse colon	MLH1, PMS2	NA	cT4bN2M0-IIIC	F	31	N	Y	Y	non-pCR
	P23	pCR	Sigmoid colon	MSH6	MSI-H	cT4aN2M0-IIIC	M	38	Y	N	N	pCR
	P27	pCR	Transverse colon	PMS2	NA	cT4bN2M0-IIIC	F	67	Y	Y	Y	pCR
	P28	pCR	Sigmoid colon	MSH2, MSH6	NA	cT4bN2M0-IIIC	M	57	Y	Y	Y	pCR
	P29	pCR	Ascending colon	MSH2, MSH6	NA	cT4bN2M0-IIIC	M	36	N	Y	Y	pCR
	P30	pCR	Ascending colon	MSH2	MSI-H	cT3N2M0-IIIB	M	45	Y	Y	Y	pCR
	P31	non-pCR	Hepatic flexure of colon	MSH2, MSH6	MSI-H	cT4aN2M0-IIIC	M	53	Y	Y	Y	non-pCR
Anti-PD-1+celecoxib	P11	pCR	Hepatic flexure of colon	MLH1, PMS2	MSI-H	cT4aN1M0-IIIB	M	65	N	Y	Y	pCR
	P14	pCR	Transverse colon	MSH6	MSI-H	cT4aN2M0-IIIC	M	50	N	Y	N	pCR
	P19	pCR	Sigmoid colon	MLH1, PMS2	NA	cT4aN2M0-IIIC	M	26	N	Y	Y	pCR
	P21	pCR	Rectum	MLH1, PMS2	NA	cT3N1M0-IIIB	F	52	Y	Y	N	pCR
	P24	pCR	Ascending colon	PMS2	MSI-H	cT4aN2M0-IIIC	F	45	Y	Y	N	pCR
	P25	pCR	Ascending colon	PMS2	MSI-H	cT4bN2M0-IIIC	F	69	Y	Y	Y	pCR
	P26	non-pCR	Hepatic flexure of colon	PMS2	NA	cT3N2M0-IIIB	F	45	N	Y	N	non-pCR
	P32	pCR	Transverse colon	MSH2	MSI-H	cT4bN2M0-IIIC	M	33	Y	Y	Y	pCR
	P33	pCR	Rectum	MSH2	MSI-H	cT4bN2M0-IIIC	M	37	Y	N	N	pCR
N,Not available; Y,Yes
# pCR, pathological complete response; non-pCR, non pathological complete response
Cancer	Dataset ID	PMID
Colorectal Cancer (CRC)	GSE236581	38981439
ID	Sample ID	Patient ID	Biopsy Site	Sampling Stage	Treatment Stage	Treatment point	Sampling approach	Response
2	P01-N-I	P01	Adjacent normal tissue	I	Pre	Baseline	Colonoscopy	CR
3	P01-T-I	P01	Tumor	I	Pre	Baseline	Colonoscopy	CR
11	P01-N-IV	P01	Adjacent normal tissue	IV	Post	Post 7 cycle	Surgery	CR
12	P01-T-IV	P01	Tumor	IV	Post	Post 7 cycle	Surgery	CR
14	P02-N-I	P02	Adjacent normal tissue	I	Pre	Baseline	Colonoscopy	SD
15	P02-T-I	P02	Tumor	I	Pre	Baseline	Colonoscopy	SD
17	P02-N-II	P02	Adjacent normal tissue	II	Post	Post 1 cycle	Colonoscopy	SD
18	P02-T-II	P02	Tumor	II	Post	Post 1 cycle	Colonoscopy	SD
20	P03-N-I	P03	Adjacent normal tissue	I	Pre	Baseline	Colonoscopy	PR
21	P03-T-I	P03	Tumor	I	Pre	Baseline	Colonoscopy	PR
24	P03-N-III	P03	Adjacent normal tissue	III	Post	Post 3 cycle	Surgery	PR
25	P03-T-III	P03	Tumor	III	Post	Post 3 cycle	Surgery	PR
27	P04-N-I	P04	Adjacent normal tissue	I	Pre	Baseline	Colonoscopy	CR
28	P04-T-I	P04	Tumor	I	Pre	Baseline	Colonoscopy	CR
33	P04-N-III	P04	Adjacent normal tissue	III	Post	Post 2 cycle	Surgery	CR
34	P04-T-III	P04	Tumor	III	Post	Post 2 cycle	Surgery	CR
36	P05-T-I	P05	Tumor	I	Pre	Baseline	Colonoscopy	PR
38	P05-N-II	P05	Adjacent normal tissue	II	Post	Post 3 cycle	Surgery	PR
39	P05-T-II	P05	Tumor	II	Post	Post 3 cycle	Surgery	PR
41	P08-N-I	P08	Adjacent normal tissue	I	Pre	Baseline	Colonoscopy	CR
43	P08-T-I	P08	Tumor	I	Pre	Baseline	Colonoscopy	CR
51	P08-N-IV	P08	Adjacent normal tissue	IV	Post	Post 4 cycle	Colonoscopy	CR
52	P08-T-IV	P08	Tumor	IV	Post	Post 4 cycle	Colonoscopy	CR
54	P09-N-I	P09	Adjacent normal tissue	I	Pre	Baseline	Colonoscopy	CR
55	P09-T-I	P09	Tumor	I	Pre	Baseline	Colonoscopy	CR
57	P09-N-II	P09	Adjacent normal tissue	II	Post	Post 3 cycle	Colonoscopy	CR
58	P09-T-II	P09	Tumor	II	Post	Post 3 cycle	Colonoscopy	CR
60	P11-N-I	P11	Adjacent normal tissue	I	Pre	Baseline	Colonoscopy	CR
61	P11-T-I	P11	Tumor	I	Pre	Baseline	Colonoscopy	CR
62	P11-N-II	P11	Adjacent normal tissue	II	Post	Post 4 cycle	Colonoscopy	CR
63	P11-T-II	P11	Tumor	II	Post	Post 4 cycle	Colonoscopy	CR
65	P12-N-I	P12	Adjacent normal tissue	I	Pre	Baseline	Colonoscopy	CR
66	P12-T-I	P12	Tumor	I	Pre	Baseline	Colonoscopy	CR
68	P12-T-II	P12	Tumor	II	Post	Post 2 cycle	Surgery	CR
70	P14-N-I	P14	Adjacent normal tissue	I	Pre	Baseline	Colonoscopy	PR
71	P14-T-I	P14	Tumor	I	Pre	Baseline	Colonoscopy	PR
76	P14-N-III	P14	Adjacent normal tissue	III	Post	Post 3 cycle	Surgery	PR
77	P14-T-III	P14	Tumor	III	Post	Post 3 cycle	Surgery	PR
79	P15-N-I	P15	Adjacent normal tissue	I	Pre	Baseline	Colonoscopy	PR
80	P15-T-I	P15	Tumor	I	Pre	Baseline	Colonoscopy	PR
82	P15-N-II	P15	Adjacent normal tissue	II	Post	Post 3 cycle	Surgery	PR
83	P15-T-II	P15	Tumor	II	Post	Post 3 cycle	Surgery	PR
85	P16-N-I	P16	Adjacent normal tissue	I	Pre	Baseline	Colonoscopy	SD
86	P16-T-I	P16	Tumor	I	Pre	Baseline	Colonoscopy	SD
89	P16-N-II	P16	Adjacent normal tissue	II	Post	Post 3 cycle	Surgery	SD
90	P16-T-II	P16	Tumor	II	Post	Post 3 cycle	Surgery	SD
92	P17-N-I	P17	Adjacent normal tissue	I	Pre	Baseline	Colonoscopy	PR
93	P17-T-I	P17	Tumor	I	Pre	Baseline	Colonoscopy	PR
95	P17-N-II	P17	Adjacent normal tissue	II	Post	Post 1 cycle	Surgery	PR
96	P17-T-II	P17	Tumor	II	Post	Post 1 cycle	Surgery	PR
98	P18-N-I	P18	Adjacent normal tissue	I	Pre	Baseline	Colonoscopy	CR
99	P18-T-I	P18	Tumor	I	Pre	Baseline	Colonoscopy	CR
104	P18-N-III	P18	Adjacent normal tissue	III	Post	Post 4 cycle	Surgery	CR
105	P18-T-III	P18	Tumor	III	Post	Post 4 cycle	Surgery	CR
107	P19-N-I	P19	Adjacent normal tissue	I	Pre	Baseline	Colonoscopy	PR
108	P19-T-I	P19	Tumor	I	Pre	Baseline	Colonoscopy	PR
113	P19-N-III	P19	Adjacent normal tissue	III	Post	Post 4 cycle	Surgery	PR
114	P19-T-III	P19	Tumor	III	Post	Post 4 cycle	Surgery	PR
116	P20-N-I	P20	Adjacent normal tissue	I	Pre	Baseline	Colonoscopy	CR
117	P20-T-I	P20	Tumor	I	Pre	Baseline	Colonoscopy	CR
122	P20-N-III	P20	Adjacent normal tissue	III	Post	Post 2 cycle	Surgery	CR
123	P20-T-III	P20	Tumor	III	Post	Post 2 cycle	Surgery	CR
125	P21-N-I	P21	Adjacent normal tissue	I	Pre	Baseline	Colonoscopy	CR
126	P21-T-I	P21	Tumor	I	Pre	Baseline	Colonoscopy	CR
129	P21-N-III	P21	Adjacent normal tissue	III	Post	Post 5 cycle	Surgery	CR
130	P21-T-III	P21	Tumor	III	Post	Post 5 cycle	Surgery	CR
132	P22-N-I	P22	Adjacent normal tissue	I	Pre	Baseline	Colonoscopy	CR
133	P22-T-I	P22	Tumor	I	Pre	Baseline	Colonoscopy	CR
138	P22-N-III	P22	Adjacent normal tissue	III	Post	Post 3 cycle	Surgery	CR
139	P22-T-III	P22	Tumor	III	Post	Post 3 cycle	Surgery	CR
141	P23-N-I	P23	Adjacent normal tissue	I	Pre	Baseline	Colonoscopy	CR
142	P23-T-I	P23	Tumor	I	Pre	Baseline	Colonoscopy	CR
150	P23-N-IV	P23	Adjacent normal tissue	IV	Post	Post 4 cycle	Surgery	CR
151	P23-T-IV	P23	Tumor	IV	Post	Post 4 cycle	Surgery	CR
153	P24-N-I	P24	Adjacent normal tissue	I	Pre	Baseline	Colonoscopy	PR
154	P24-T-I	P24	Tumor	I	Pre	Baseline	Colonoscopy	PR
156	P24-N-II	P24	Adjacent normal tissue	II	Post	Post 3 cycle	Colonoscopy	PR
157	P24-T-II	P24	Tumor	II	Post	Post 3 cycle	Colonoscopy	PR
159	P25-N-I	P25	Adjacent normal tissue	I	Pre	Baseline	Colonoscopy	SD
160	P25-T-I	P25	Tumor	I	Pre	Baseline	Colonoscopy	SD
162	P25-N-II	P25	Adjacent normal tissue	II	Post	Post 3 cycle	Colonoscopy	SD
163	P25-T-II	P25	Tumor	II	Post	Post 3 cycle	Colonoscopy	SD
165	P26-N-I	P26	Adjacent normal tissue	I	Pre	Baseline	Colonoscopy	CR
166	P26-T-I	P26	Tumor	I	Pre	Baseline	Colonoscopy	CR
168	P26-N-II	P26	Adjacent normal tissue	II	Post	Post 3 cycle	Surgery	CR
169	P26-T-II	P26	Tumor	II	Post	Post 3 cycle	Surgery	CR
CR :Complete Response; PR: Partial Response; SD: Stable Disease
Cancer	Dataset ID	PMID
esophageal squamous cell carcinoma (ESCC)	PRJCA016745/OMIX005710	38566201
OMI	HRS	patient	response
OMIX005710-03	HRS849537	P13_N_A	MPR
OMIX005710-04	HRS849514	P2_N_B	IPR
OMIX005710-05	HRS849512	P1_T_B	MPR
OMIX005710-06	HRS849534	P11_N_A	pCR
OMIX005710-07	HRS849531	P10_T_A	MPR
OMIX005710-08	HRS849516	P3_N_B	MPR
OMIX005710-09	HRS849524	P6_N_A	IPR
OMIX005710-10	HRS849513	P2_T_B	IPR
OMIX005710-11	HRS849518	P4_T_B	pCR
OMIX005710-12	HRS849520	P5_T_A	pCR
OMIX005710-13	HRS849532	P10_N_A	MPR
OMIX005710-14	HRS849522	P6_T_B	IPR
OMIX005710-15	HRS849525	P7_T_B	NA
OMIX005710-16	HRS849519	P4_N_B	pCR
OMIX005710-17	HRS849528	P9_T_B	MPR
OMIX005710-18	HRS849530	P9_N_A	MPR
OMIX005710-19	HRS849535	P12_N_B	NA
OMIX005710-20	HRS849517	P3_N_A	MPR
OMIX005710-21	HRS849548	P18_N_A	pCR
OMIX005710-22	HRS849550	P19_T_A	pCR
OMIX005710-23	HRS849542	P16_T_A	IPR
OMIX005710-24	HRS849527	P8_N_A	IPR
OMIX005710-25	HRS849526	P8_T_A	IPR
OMIX005710-26	HRS849543	P16_N_A	IPR
OMIX005710-27	HRS849546	P18_T_B	pCR
OMIX005710-28	HRS849545	P17_N_A	pCR
OMIX005710-29	HRS849539	P15_T_B	MPR
OMIX005710-30	HRS849553	P20_N_B	IPR
OMIX005710-31	HRS849544	P17_T_A	pCR
OMIX005710-32	HRS849549	P19_T_B	pCR
OMIX005710-34	HRS849540	P15_T_A	MPR
OMIX005710-35	HRS849547	P18_T_A	pCR
OMIX005710-36	HRS849538	P14_T_B	NA
OMIX005710-37	HRS849554	P21_T_B	pCR
OMIX005710-38	HRS849556	P22_T_B	NA
OMIX005710-39	HRS849541	P16_T_B	IPR
OMIX005710-40	HRS849555	P21_N_B	pCR
OMIX005710-41	HRS849551	P19_N_A	pCR
OMIX005710-42	HRS849552	P20_T_B	IPR
OMIX005710-43	HRS849557	P22_N_B	NA
OMIX005710-44	HRS849523	P6_T_A	IPR
OMIX005710-45	HRS849515	P3_T_B	MPR
OMIX005710-46	HRS849529	P9_T_A	MPR
OMIX005710-47	HRS849521	P5_N_A	pCR
OMIX005710-48	HRS849533	P11_T_A	pCR
OMIX005710-49	HRS849536	P13_T_A	MPR
IPR: Immune-Related Partial Response; MPR: Major Pathologic Response; pCR: Pathologic Complete Response; NA: Not Available
Cancer	Dataset ID	PMID
renal cell carcinoma（RCC）	SCP1288 (https://singlecell.broadinstitute.org/single_cell/study/SCP1288)	33711272
Sample	Study ID	Age at Dx	Sex	ICB	Duration of ICB Regimen	Time from end of ICB to Biopsy	ICB Response	response	TKI-exposed	Biopsy Site	Histology	Grade	Stage	Cells Recovered Post-QC
P55	0600855_T3	57.1417	M	aPD-1	24 mo.	-2 mo.	PR	R	TKI	Abdominal Mass	Clear cell	3	IV	4637
P915	0600915_T1	58.2259	M	aPD-1 + aCTLA-4	2 mo.	3 mo.	PR	R	No TKI	Kidney	Clear cell	3	IV	6541
P913	0600913_T1	47.1951	M	aPD1 + VEGF TKI	10 mo.	2 mo.	SD	NR	TKI	Lung	Clear cell	4	IV	3744
P906	0600906_T1	61.8125	M	aPD-1	15 mo.	6 mo.	PD	NR	TKI	Lymph node	Papillary	3	IV	2470
P76	0600876_T1	67.822	F	No ICB	N/A	N/A	N/A	NA	No TKI	Kidney	Clear cell	4	IV	7912
P916	0600916_T1	61.0541	M	No ICB	N/A	N/A	N/A	NA	No TKI	Lymph node	Clear cell	4	IV	316
P90	0600890_T1	71	F	No ICB	N/A	N/A	N/A	NA	No TKI	Kidney	Clear cell	4	I	8426
PR: partial response; SD: stable disease; PD: progressive disease NA: Not available
