# Supplementary material for: Constructing a Predictive Model for PD-1 Blockade Therapy in Pan-Cancer Based on Machine Learning
Source: Research Square preprint supplement (doi:10.21203/rs.3.rs-6317412/v1), 2025-04-03
Supplement: Supplementary file 2 [file aec3c5d5fd4e10bcbb1420dc.xlsx]

## Sheet: Table S2
Supplementary Table S2 Here
Legend: Table S2 provides the dataset accession numbers and references.
Non-small cell lung carcinoma（NSCLC）	GSE135222	31537801
Colorectal Cancer（CRC）	GSE154538	34014607
Triple-Negative Breast Cancer（TNBC）	GSE241876	37882661
Gastriccancer（GC）	PRJEB25780	30013197
Esophageal cancer(EC)	GSE154538	30013197
Hepatocellular carcinoma（HCC）	GSE215011	38307859
	GSE202069	37540187
Oral-cavity squamous cell carcinoma（OSCC）	GSE179730	34755131
melanoma	GSE91061	29033130
